# Supplementary material for: FGF18 alleviates sepsis-induced acute lung injury by inhibiting the NF-κB pathway
Source: Springer Nature journal article supplement (doi:10.1186/s12931-024-02733-1), 2024-02-28

# Fig 1-4

Fig 1

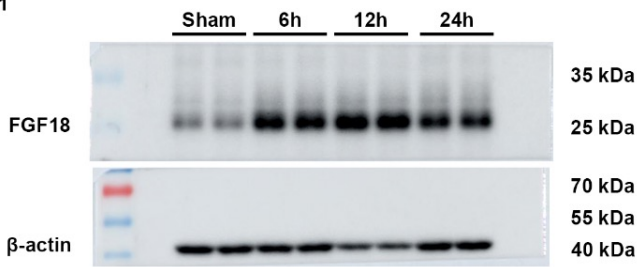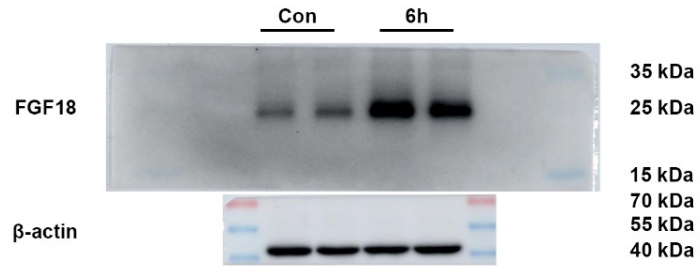

Fig 2

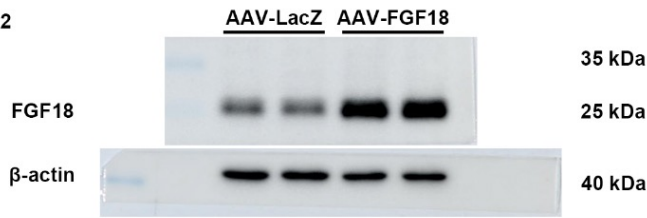

| LPS       | - | - | + | + |
|-----------|---|---|---|---|
| AAV-LacZ  | + | - | - | - |
| AAV-FGF18 | - | + | - | + |

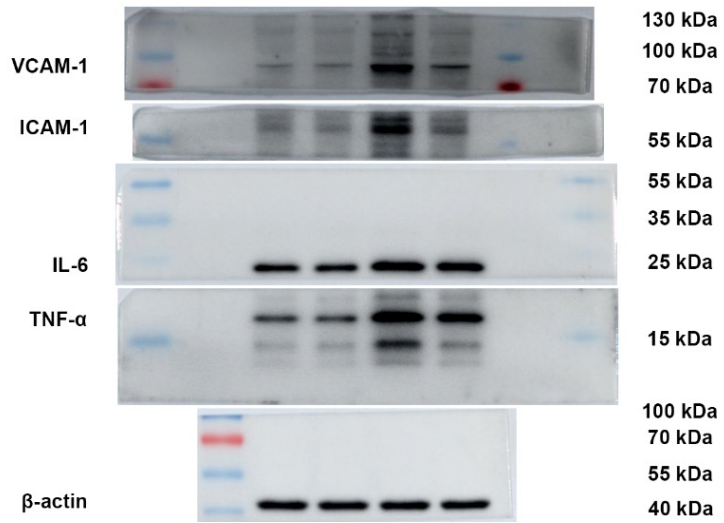

Fig 3

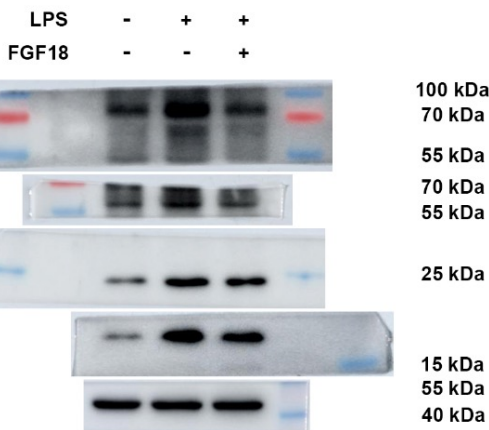

Fig 4

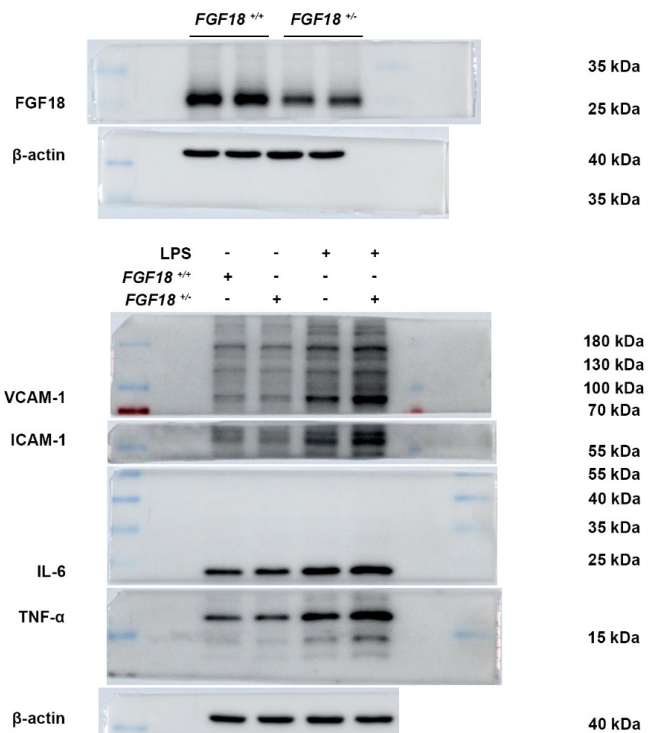

# Fig 5-8

Fig 5

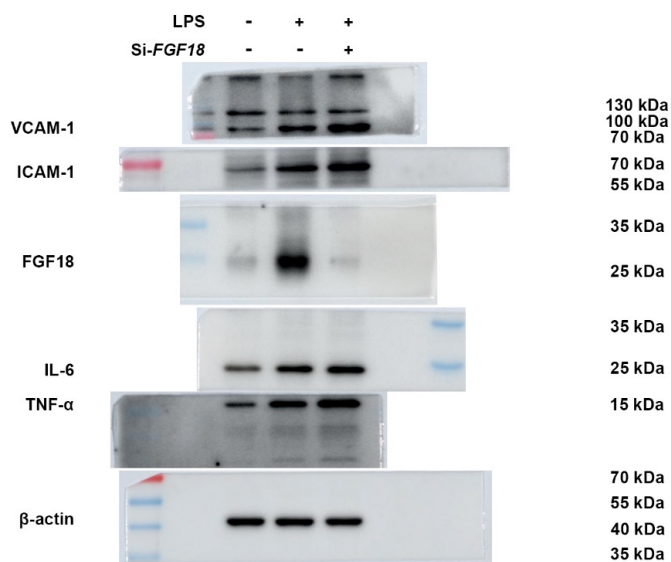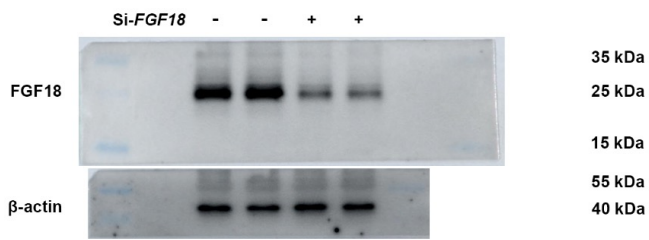

Fig 6

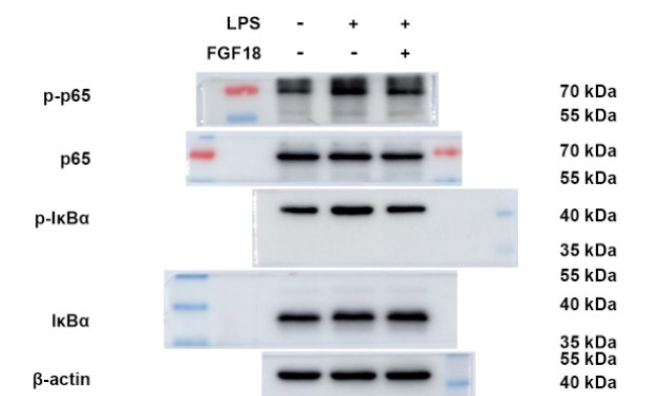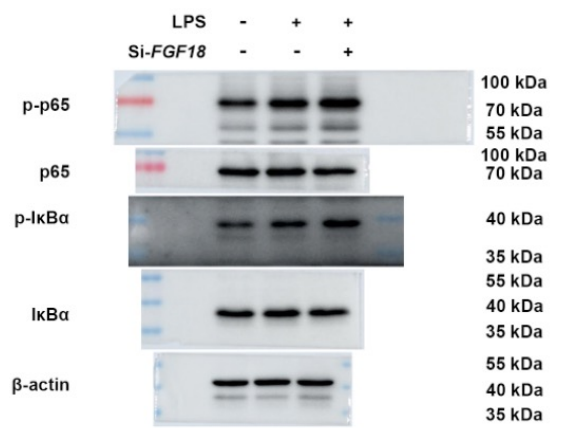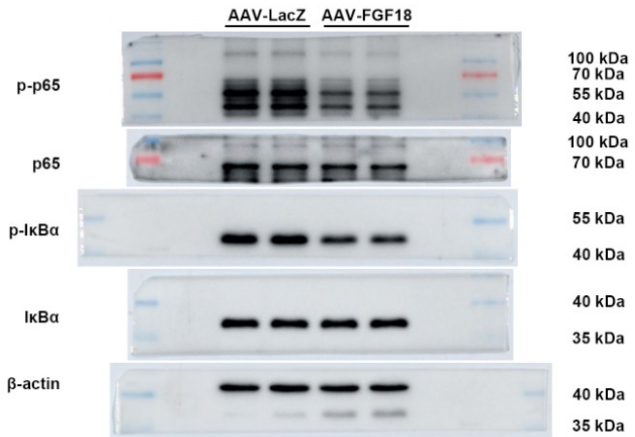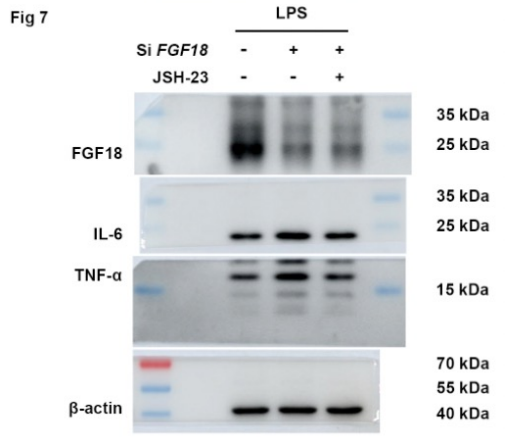

Fig 7

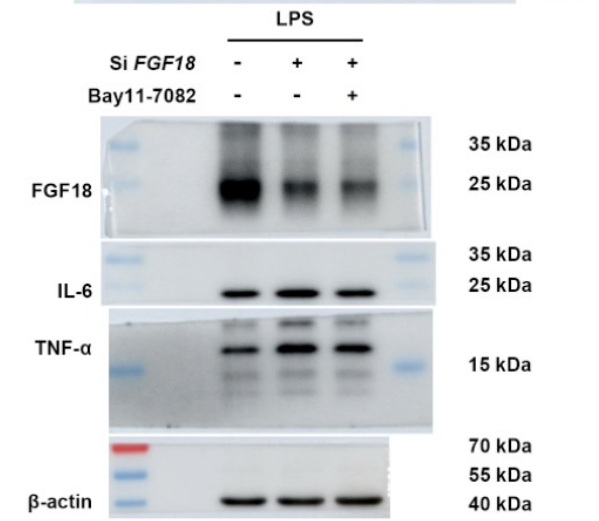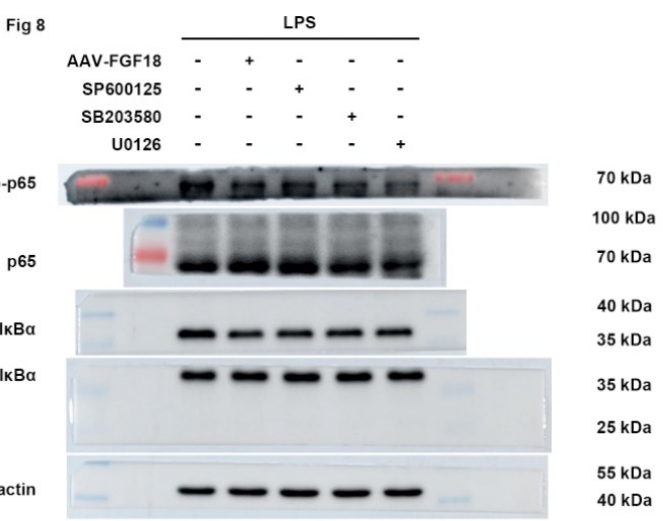

# Supplementary Fig 1/3/7/8

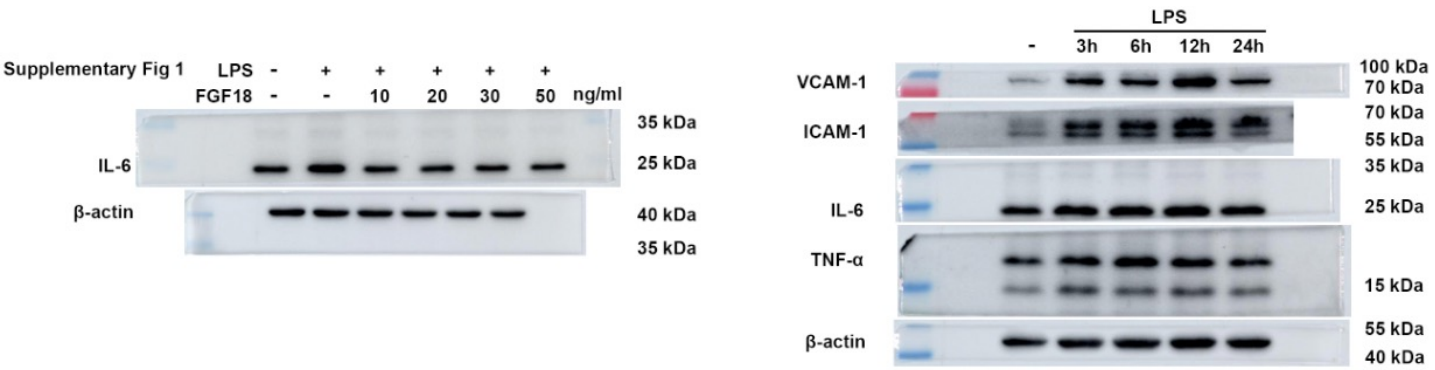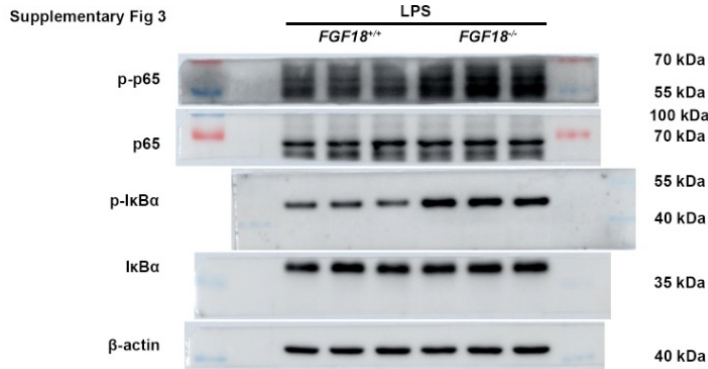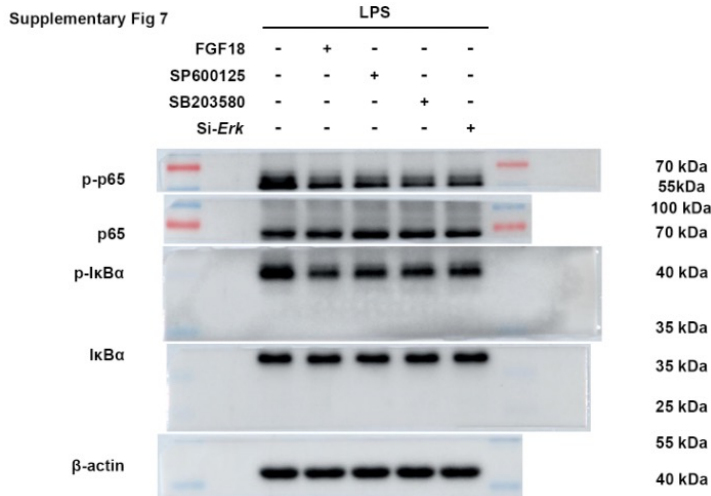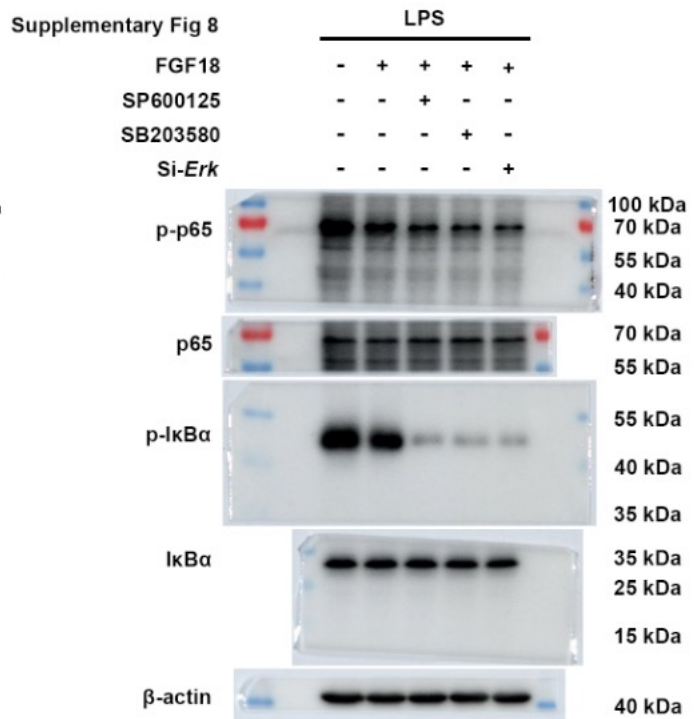

Supplement: 12931_2024_2733_MOESM2_ESM.pdf [file 12931_2024_2733_MOESM2_ESM.pdf]
